# Supplementary material for: Phylogenetic relationships within the primitive acanthomorph fish genus Polymixia, with changes to species composition and geographic distributions
Source: PLoS One. 2019 Mar 1;14(3):e0212954. doi: 10.1371/journal.pone.0212954 (PMC6396927; doi:10.1371/journal.pone.0212954)
Supplement: S1 Table — (XLSX) [file pone.0212954.s001.xlsx]

## Sheet: Sheet1
Borden, Grande & Wilson 2019 Phylogenetic relationships within the primitive acanthomorph fish genus Polymixia…
S1 Table. Meristic and morphological characters for species of Polymixia. Data from original descriptions, Kotlyar (1993), and new observations from CSIRO and this study
Name	soft rays in dorsal fin; (fin length/SL from Kotlyar)	dorsal fin spines	soft rays in anal fin	anal fin spines	rays in pectoral fin; (fin length/SL from Kotlyar)	total pelvic rays	rakers in first gill arch	Pyloric caeca	vertebrae
P. salagomeziensis (n = 6 +1)	35–37; 35–37; (35); (35) (41.9–44.7)	5; (5); (5)	15; (15); (15)	4; (4); (4)	17-18; (17); (17); (21.8-22.7)	7	15-16; (16); (15-16)	30-45; (30-45)	13+16=29; (29)
P. nobilis (n = 6 + 12)	34–38; 34–37; (36–38); (36); (41.3–44.3)	4 to 5; (5); (5)	15-18; (17-18); (16)	3 to 4; (4); (4)	16-18; (16-17); (16); (15.7 -18.9)	6 or 7; (7); (6)	10 to 13	108	14+15=29; (28-29); (29)
P. yuri (n = 23 + 1)	34–37; 34-37; (36); (36); (39.4-45.8)	5 to 6; (5); (5)	16-18; (18); (18)	4; (4); (4)	18-19; (18); (18); (16.4 - 20.2)	7; (7); (7)	12 to 13; (12)	90-135; (90-135)	14+14=28; (28)
P. lowei (n = 7 + 52)	26-32; 26-32; (28-31); (30); (39.1-41.0)	5 to 6; (5-6); (5)	13-17; (16, 18); (16)	3 to 4; (4); (3)	15-17; (15,16,17); (17); (14.0 - 22.4)	7; (7); (7)	14-22	27-30	29-30; (29)
P. fusca (n = 85)	30-34; 30-34; (33); (42.2-47.7)	5 to 6; (5)	13-15; (13)	3, 4, 5; (4)	14-16; (14); (18.6-21.5)	7	14-17; (16)	39-49	13+16=29; (27)
P. longispina ( n = 8 + 8)	29-32; 30-31; (29-32); (29-31); (38.4-43.2)	5; (5-6); (5)	15-16; (14-15); (14-15)	4; (4); (4)	14-15; (15-16); (14-15); (18.0-20.50 )	7	13-14	35-40	13 +16 = 29; (29); (28)
P. japonica (n = 26 + 2 + 23)	31-34; 31-34; (33,35); (32-34); (34); (37.8-46.3)	5; (5); (5); (5)	13-17; (15-16); (16-17); (16)	4; (4); (4); (4)	15-17; (16); (16,17,18); (17); (12.1-15.7)	7	11–16 (14 in most)	48-65	12-13+16-17=29; (29)
P. berndti (n = 31 + 7 + 17)	28-31; 28-31; (29-31); (28-31); (30); (37.0-42.6)	4 to 5; (5); (5); (5)	14-17; (14-16); (15-17); (17)	4; (4); (3-4); (4)	15-17; (15-16); (15-16); (16 or 17); (17.1-21.4)	(7); (7)	12 to 15; (13)	28-48	13-14+15-6=29; (28-29); (29)
P. sazonovi (n = 4 + 1)	35-36; 35-36; (35); (35); (39.0-42.3)	5 to 6; (5); (5)	16-18; (17 or 18); (18)	4; (4); (4)	17-18; (17.8 - 19.2); (18)	7; (7); (7)	11; (11)	101-104; (101 and 104)	13+ 16=29; (29)
P. busakhini (n = 4 + 3)	33-36; 33-36; (35-36); (33); (41.6-45.0)	5; (5); (5)	15- 16; (15-17); (16)	4; (4); (4)	16-17; (17-18); (16); (18.4 - 21.1)	7	11; (11)	40	12+17=29; (29); (29)
Name	end of pectoral fin to end of pelvic fin	margin of preopercle	ctenii distribution	S1	S2	S3	scales above ll - squ	pored ll scales
P. salagomeziensis	ends same as pelvics:		wedge (4- 5 rows)	7 to 8 (n = 6); 8 (n = 1); (8)	14,15,16; (14); (15)	15-16; (17); (16)	62-65; (64)	37 and 39; (38-39); (38-39)
P. nobilis	to middle of pelvics; at least as long as pelvics	Pointed; Angular	wedge (5-8 rows); (wedge, 4-5 rows)	7 to 8 (n = 6)	15 to 16	14 to 16	55-60	32-37; 36 (48 total)
P. yuri	to middle of pelvics; at least al long as pelvics	Angular	wedge (3-4 rows); (wedge, 4-5 rows)	7 to 8 (n = 23); (7)	10 to 15; (13)	12 to 15; (14)	59-64; (61)	36-39; (37)
P. lowei	at least as long as pelvics; (near end of pelvic)	Rounded; (Rounded)	vertical; (vertical, 1- 2 rows)	5,6,7 (n = 7)	10 to 13	12,13	51-62	31-36; (50 total)
P. fusca	at lease as long as pelvics	Rounded	vertical	6 to 7 rarely 8 ( n= 85)	11 to 14	14 to 16	57-62	34-38; (36)
P. longispina	at least as long as pelvics	Rounded	vertical; verticle	5 (n = 8); 5-6 (n = 8)	10 to 12; (9-10)	13 to 14; (12-15)	50-57	33-35; (32-33)
P. japonica	at least as long as pelvics	Rounded	wedge (3-4); wedge; (wedge)	7 to 8 (n = 26); 7-8 (n = 2)	13 to 16; (11-13)	15-16; (16-17)	57-63	34-39; (34); (60 total)
P. berndti	at least as long as pelvics; at least as long as pelvics	Rounded; Rounded	vertical (1-2 rows); vertical; (vertical, 1-2 rows)	5 to 6 (n= 31); 5-7 (n = 7)	9 to 12; (7 -8)	12 to 15; (12- 13)	55-60	32-36; (34-36); (35 or 36)
P. sazonovi	near end of pelvic	Rounded	wedge (4-5 rows)	8 (n = 4); (8)	15-16; (15)	15 to 16; (15)	57-62; (57)	36-38; (38)
P. busakhini	ends same as pelvics; 2/3 or as long as pelvics	Angular	wedge (4-5 rows); wedge	7 to 8 (n = 4); 7-8 (n = 3); (8)	14 to 15; (11-13); (15)	16; (15-16); (16)	60-62; (61)	36-37; (37); (37)
Key to colors and sources
black = summary of all data
orange = Kotlyar counts
green = observations by CSIRO Australia
blue = new observations this study including interpretation of figures of type specimens
red = Type specimen(s)
Bold = most common count
